# Supplementary material
Source: ML conference proceedings conference paper supplement (https://openaccess.thecvf.com/content/CVPR2026/html/Zhou_R2G_A_Multi-View_CVPR_2026_paper.html)
Supplement: Supplementary file 1 [file Zhou_R2G_A_Multi-View_CVPR_2026_supplemental.pdf]

# R<sup>2</sup>G : A Multi-View Circuit Graph Benchmark Suite from RTL to GDSII

## Supplementary Material

This supplementary material provides comprehensive details, implementation specifics, and additional experimental analyses to support the main manuscript. The document is organized as follows: **Section A** offers a practical guide and API examples for utilizing the R2G benchmark suite. **Section B** categorizes existing graph datasets to contextualize the unique contribution of the R2G benchmark. **Section C** elaborates on the data processing pipeline, specifically the DEF parser used to translate physical layouts into graph structures. **Section D** presents granular statistics across the multi-view graph representations. **Section E** provides an in-depth look at the experimental setup, detailing hyperparameter tuning strategies. Finally, **Section F** presents ablation studies on GNN and head depths.

### A. Usage

R2G provides a reproducible pipeline that converts OpenROAD DEF files into multi-view circuit graphs and supports standardized GNN training and evaluation. The workflow consists of two main stages: (1) graph generation from physical-design files and (2) model training and evaluation on the generated datasets.

#### A.1. Data Generation Pipeline

R2G converts physical design outputs into graph datasets through a multi-stage pipeline. Starting from DEF files generated by the OpenROAD flow, the framework constructs typed circuit graphs and produces datasets compatible with PyTorch Geometric.

The pipeline consists of three steps:

- **Heterograph generation:** DEF files are parsed to construct typed heterogeneous graphs containing gates, nets, pins, and IO nodes. Multiple graph views (B-F) can be generated using the provided scripts in `data_pipeline/heterograph_generation/`.
- **Homograph conversion:** The heterogeneous graphs are converted into homogeneous graphs for efficient GNN training using the converters in `data_pipeline/homograph_conversion/`.
- **Graph merging:** Graphs from multiple designs are merged into a single dataset to enable large-scale training. The resulting merged graphs are stored as PyTorch `.pt` files and serve as the final benchmark datasets.

This pipeline converts DEF-based physical layouts into standardized circuit graphs suitable for machine learning tasks such as placement and routing prediction.

#### A.2. Model Training

The generated datasets can be used directly for GNN training. R2G provides training scripts for prediction tasks at different supervision granularities.

- **Node-centric configurations:** Training scripts are located in the `gnn-node/` directory. In the released base-lines, they are used for placement-oriented targets such as HPWL.
- **Edge-centric configurations:** Training scripts are located in the `gnn-edge/` directory. In the released base-lines, they are used for routing-oriented targets such as wire-length prediction.

Each training pipeline includes dataset loading, feature encoding, neighbor sampling, model initialization, and evaluation. The framework supports multiple GNN architectures including GINE, ResGatedGCN, and GAT.

#### A.3. Training Example

A typical node-centric configuration for the placement task is shown below:

```
1 cd gnn-node
2
3 python main.py \
4     --dataset place_B_homograph \
5     --task_level node \
6     --task regression \
7     --model gine \
8     --num_gnn_layers 4 \
9     --num_head_layers 4 \
10    --hid_dim 256 \
11    --epochs 100 \
12    --gpu 0
```

Listing 1. Example training command for a node-centric placement configuration.

Similarly, routing tasks can be trained using the scripts in `gnn-edge/`.

#### A.4. Evaluation

During training, the framework automatically reports standard regression metrics including Mean Absolute Error (MAE), Root Mean Squared Error (RMSE), and the coefficient of determination ( $R^2$ ). The best-performing model on the validation set is saved and evaluated on the test set.

Additional analysis tools are provided to visualize prediction quality, including scatter plots and label distribution statistics.

Table 9. Overview of existing graph datasets. Tasks include Classification (C), Regression (R), and Link prediction (L).

| Benchmark Suite | Category       | Level          | Task  | Statistics |           |            | Metric |              |
|-----------------|----------------|----------------|-------|------------|-----------|------------|--------|--------------|
|                 |                |                |       | #Node/G    | #Edge/G   | #Degree/G  |        |              |
| OGB             | ogbn-products  | Product        | node  | C          | 2,449,029 | 61,859,140 | 50.5   | Accuracy     |
|                 | ogbn-mag       | Academic       | node  | C          | 1,939,743 | 21,111,007 | 21.77  | Accuracy     |
|                 | ogbl-ppa       | Bio            | edge  | L          | 576,289   | 30,326,273 | 105.2  | Hits@100     |
|                 | ogbl-citation2 | Citation       | edge  | L          | 2,927,963 | 30,561,187 | 20.9   | MRR          |
| TU              | QM9            | Molecules      | node  | R          | 18        | 19         | 2.07   | MAE          |
|                 | ZINC           | Molecules      | graph | R          | 23        | 25         | 2.14   | MAE          |
|                 | PROTEINS       | Bio            | graph | C          | 39        | 73         | 3.73   | Accuracy     |
|                 | reddit         | Social         | graph | C          | 24        | 25         | 2.03   | F1-Score     |
|                 | COLLAB         | Social         | graph | C          | 74        | 2,458      | 37.39  | F1-Score     |
| SNAP            | ego-Twitter    | Social         | node  | C          | 81306     | 1768149    | 43.49  | F1-Score     |
|                 | com-Youtube    | Social         | node  | C          | 1134890   | 2987624    | 5.27   | F1-Score     |
|                 | cit-Patents    | Citation       | node  | C          | 3774768   | 16518948   | 8.75   | F1-Score     |
|                 | web-Google     | Web            | node  | C          | 875713    | 5105039    | 11.66  | F1-Score     |
|                 | amazon-meta    | Product        | node  | C          | 548552    | 1788725    | 6.52   | F1-Score     |
| R2G             | B-graph        | Circuit Design | node  | R          | 124408    | 149287     | 2.4    | MAE          |
|                 | C-graph        | Circuit Design | node  | R          | 49921     | 110166     | 4.41   | MAE          |
|                 | D-graph        | Circuit Design | edge  | R/C        | 89640     | 107689     | 2.4    | MAE/F1-Score |
|                 | E-graph        | Circuit Design | edge  | R/C        | 64975     | 78789      | 2.43   | MAE/F1-Score |
|                 | F-graph        | Circuit Design | edge  | R/C        | 25061     | 46597      | 3.72   | MAE/F1-Score |

## B. Overview of existing graph datasets

Benchmarks and tasks. We situate widely used graph suites alongside our circuit-graph benchmark, as summarized in Table 9. OGB [13] targets large-scale node, link, and graph tasks with unified splits and metrics; TUDataset [21] aggregates small-to-mid collections (molecules, bio, social) for graph-level classification and regression; SNAP [17] curates massive social, web, and citation networks for node classification and link prediction. These domain-agnostic, predominantly single-view resources lack typed heterogeneity, multi-terminal hyperedges, and geometry-aware attributes required for physical design.

R2G differs fundamentally. It releases typed, heterogeneous circuit graphs extracted from DEF, with stage-aware, multi-view representations and *information parity*. Targets are attached at the entity resolution induced by each view, with domain metrics aligned to EDA objectives in placement and routing. Graphs are industrial yet tractable, capturing net topology, pin-level connectivity, and macro-to-cell context. With scalable loaders, unified splits, metrics, and reproducible baselines, R2G enables fair cross-view comparison and cleanly decouples representation from modeling across late physical-design stages.

## C. DEF Parser

To bridge the gap between physical layout implementation and graph-based learning, the R2G framework incorporates a specialized DEF parser. This component is responsible for extracting semantic and geometric information from standard Design Exchange Format (DEF) files, converting them into the structured graph representations used in our benchmark. In this section, we first detail the structural evolution of DEF files throughout the design flow to clarify the data availability at each stage. Subsequently, we outline the algorithmic procedure used to translate these raw descriptions into heterogeneous graphs.

### C.1. DEF File Description

The Design Exchange Format (DEF) serves as the standard for exchanging physical layout information. Its content evolves significantly through the physical design stages:

- **Floorplan Stage:** This stage establishes the “geometric stage” and power distribution. The DEF file defines the design bounds (DIEAREA), standard cell rows (ROW), and routing tracks (TRACKS). Power networks (SPECIALNETS) are often generated here (e.g., VD-D/VSS stripes). Logical connections (NETS) exist but lack physical geometry, and components generally lack fixed coordinates unless manually locked.
- **Placement Stage:** Specific physical coordinates are assigned. Standard cells in the COMPONENTS section are updated with + PLACED (x y) coordinates and orientations. Similarly, I/O pins in the PINS section are assigned specific metal layers and physical locations (+ PORT + LAYER). Signal nets remain logical connections without detailed routing segments.
- **Routing Stage:** The layout is finalized with detailed interconnects. A global routing grid (GCELLGRID) is often added. The NETS section is populated with detailed physical paths, including wire segments, turns, and cross-layer vias using the + ROUTED . . . NEW syntax. The component count may increase due to the insertion of filler cells or buffers.

Listing 2 illustrates a routed DEF file structure, highlighting the information accumulated from these stages.

### C.2. DEF-to-Graph Conversion

The conversion process from a raw DEF file to a structured graph representation is outlined in Algorithm 1.

The DEF-to-Graph Conversion Algorithm transforms a Design Exchange Format (DEF) file, which describes the physical layout of an integrated circuit, into a heterogeneous graph representation suitable for machine learning and analysis tasks. This algorithm systematically converts circuit components into graph nodes and their interconnections into graph edges, creating a structured representation that preserves the topological and functional relationships within the circuit design.

The conversion process involves three main phases: Node Construction (creating nodes for gates, nets, and pins), Edge Construction (establishing connectivity between components), and Feature Encoding (adding numerical attributes to nodes and edges). The resulting heterogeneous graph captures both the structural hierarchy and physical properties of the circuit, enabling applications in optimization, verification, and AI-driven design automation.

Table 10. Comparison of graph statistics across graph views and design categories.

| Cat.                 | RTL2G          | #nodes  |         |         |         |         | #edges   |         |         |         |         | avg_degree |      |      |      |       | avg_shortest path |       |       |       |      |
|----------------------|----------------|---------|---------|---------|---------|---------|----------|---------|---------|---------|---------|------------|------|------|------|-------|-------------------|-------|-------|-------|------|
|                      |                | (b)     | (c)     | (d)     | (e)     | (f)     | (b)      | (c)     | (d)     | (e)     | (f)     | (b)        | (c)  | (d)  | (e)  | (f)   | (b)               | (c)   | (d)   | (e)   | (f)  |
| AV ctrl.             | ss_pcm         | 2.44k   | 1.01k   | 1.89k   | 1.46k   | 0.46k   | 2.88k    | 2.02k   | 2.36k   | 1.66k   | 1.01k   | 2.37       | 4.01 | 2.49 | 2.28 | 4.35  | 12.07             | 3.00  | 9.81  | 12.69 | 4.05 |
|                      | ac97_ctrl      | 58.22k  | 22.99k  | 40.86k  | 30.63k  | 10.36k  | 70.60k   | 47.20k  | 52.19k  | 36.83k  | 23.50k  | 2.43       | 4.11 | 2.55 | 2.40 | 4.54  | 13.41             | 3.00  | 13.76 | 21.20 | 5.65 |
|                      | vga_lcd        | 531.33k | 206.01k | 369.72k | 275.41k | 94.51k  | 650.84k  | 445.88k | 455.43k | 325.55k | 197.12k | 2.45       | 4.33 | 2.46 | 2.36 | 4.17  | 14.33             | 3.02  | 24.37 | 31.42 | 8.00 |
|                      | <b>Average</b> | 197.33k | 76.67k  | 137.49k | 102.50k | 35.11k  | 241.44k  | 165.03k | 170.00k | 121.35k | 74.08k  | 2.42       | 4.15 | 2.50 | 2.35 | 4.35  | 13.27             | 3.01  | 15.98 | 21.77 | 5.90 |
| Crypto Core          | des3_area      | 9.78k   | 3.65k   | 7.94k   | 6.33k   | 1.80k   | 12.46k   | 9.29k   | 11.17k  | 9.41k   | 5.10k   | 2.55       | 5.09 | 2.81 | 2.97 | 5.66  | 18.16             | 3.28  | 15.43 | 12.42 | 6.13 |
|                      | systemcdes     | 14.17k  | 5.76k   | 10.73k  | 8.14k   | 2.79k   | 17.02k   | 12.84k  | 13.48k  | 10.13k  | 5.73k   | 2.40       | 4.46 | 2.51 | 2.49 | 4.11  | 20.60             | 3.18  | 19.62 | 17.26 | 7.20 |
|                      | systemcaes     | 41.08k  | 16.13k  | 31.74k  | 24.34k  | 7.78k   | 50.29k   | 36.81k  | 40.30k  | 30.46k  | 16.83k  | 2.45       | 4.56 | 2.54 | 2.50 | 4.33  | 18.02             | 3.16  | 13.91 | 18.13 | 6.20 |
|                      | sha256         | 62.83k  | 25.06k  | 47.57k  | 36.52k  | 11.83k  | 76.32k   | 56.36k  | 59.51k  | 45.47k  | 24.70k  | 2.43       | 4.50 | 2.50 | 2.49 | 4.18  | 18.66             | 2.88  | 16.43 | 17.12 | 6.75 |
|                      | aes_secworks   | 128.40k | 46.60k  | 96.64k  | 75.04k  | 22.12k  | 164.11k  | 113.16k | 128.92k | 99.87k  | 56.87k  | 2.56       | 4.86 | 2.67 | 2.66 | 5.14  | 19.92             | 2.93  | 19.73 | 20.61 | 7.07 |
|                      | aes_encrypt    | 165.76k | 58.42k  | 135.12k | 107.08k | 28.43k  | 215.07k  | 156.35k | 188.34k | 156.69k | 81.88k  | 2.60       | 5.35 | 2.79 | 2.93 | 5.76  | 20.68             | 2.97  | 17.39 | 16.57 | 7.17 |
| <b>Average</b>       | 73.85k         | 26.27k  | 58.29k  | 44.58k  | 12.46k  | 92.55k  | 64.13k   | 75.32k  | 58.67k  | 31.84k  | 2.50    | 4.77       | 2.64 | 2.64 | 4.86 | 19.34 | 3.07              | 17.08 | 17.02 | 6.75  |      |
| Processor            | tv80           | 31.14k  | 11.44k  | 24.91k  | 19.47k  | 5.51k   | 39.45k   | 29.34k  | 34.25k  | 28.48k  | 15.14k  | 2.53       | 5.13 | 2.75 | 2.93 | 5.50  | 16.71             | 3.10  | 14.48 | 13.95 | 5.94 |
|                      | tv80s          | 37.24k  | 14.39k  | 28.88k  | 21.96k  | 6.97k   | 45.74k   | 35.41k  | 37.09k  | 29.41k  | 15.52k  | 2.46       | 4.92 | 2.57 | 2.68 | 4.45  | 19.02             | 3.14  | 17.64 | 17.13 | 7.05 |
|                      | riscv32i       | 53.23k  | 19.76k  | 40.78k  | 31.50k  | 9.41k   | 66.91k   | 47.74k  | 56.38k  | 45.79k  | 26.04k  | 2.51       | 4.83 | 2.77 | 2.91 | 5.53  | 17.43             | 3.20  | 15.24 | 15.57 | 5.42 |
|                      | ibex           | 96.60k  | 35.64k  | 72.50k  | 56.14k  | 16.62k  | 122.18k  | 84.69k  | 98.88k  | 79.63k  | 43.94k  | 2.53       | 4.75 | 2.73 | 2.84 | 5.29  | 18.44             | 3.05  | 17.90 | 18.85 | 6.86 |
|                      | tinyRocket     | 50.63k  | 32.60k  | 42.82k  | 15.43k  | 27.66k  | 36.27k   | 66.69k  | 26.03k  | 13.54k  | 14.90k  | 1.43       | 4.09 | 1.22 | 1.75 | 1.08  | 11.00             | 2.40  | 9.68  | 12.07 | 4.53 |
|                      | swerv          | 538.36k | 196.94k | 384.55k | 294.23k | 92.36k  | 684.89k  | 469.98k | 510.70k | 388.58k | 229.49k | 2.54       | 4.77 | 2.66 | 2.64 | 4.97  | 17.10             | 3.08  | 19.33 | 28.16 | 8.22 |
|                      | bp_multi       | 296.72k | 171.27k | 235.98k | 107.09k | 130.34k | 250.15k  | 353.77k | 176.42k | 102.51k | 86.96k  | 1.69       | 4.13 | 1.50 | 1.91 | 1.33  | 11.72             | 2.58  | 18.45 | 25.72 | 6.42 |
| <b>Average</b>       | 154.85k        | 69.63k  | 118.58k | 78.52k  | 29.88k  | 177.80k | 155.03k  | 163.18k | 114.28k | 61.65k  | 2.15    | 4.51       | 2.17 | 2.41 | 3.90 | 15.90 | 2.94              | 16.10 | 18.64 | 6.36  |      |
| Comm. ctrl.          | uart           | 2.73k   | 1.11k   | 1.94k   | 1.48k   | 0.52k   | 3.29k    | 2.30k   | 2.60k   | 1.88k   | 1.15k   | 2.41       | 4.13 | 2.67 | 2.54 | 4.47  | 13.80             | 3.27  | 14.79 | 10.61 | 5.63 |
|                      | sasc_top       | 3.45k   | 1.38k   | 2.44k   | 1.84k   | 0.63k   | 4.17k    | 2.88k   | 3.01k   | 2.12k   | 1.33k   | 2.42       | 4.18 | 2.47 | 2.31 | 4.22  | 12.20             | 2.88  | 12.69 | 15.79 | 4.75 |
|                      | i2c_verilog    | 4.69k   | 1.85k   | 3.39k   | 2.56k   | 0.87k   | 5.70k    | 4.03k   | 6.54k   | 5.28k   | 4.12k   | 2.43       | 4.35 | 3.86 | 4.13 | 9.51  | 13.42             | 3.02  | 11.96 | 13.93 | 5.49 |
|                      | simple_spi_top | 4.57k   | 1.84k   | 3.35k   | 2.52k   | 0.85k   | 5.49k    | 3.89k   | 4.17k   | 3.01k   | 1.80k   | 2.40       | 4.23 | 2.49 | 2.39 | 4.23  | 13.33             | 2.90  | 12.23 | 13.55 | 4.93 |
|                      | spi_top        | 15.62k  | 6.07k   | 12.31k  | 9.47k   | 2.93k   | 19.18k   | 14.21k  | 19.15k  | 15.39k  | 9.99k   | 2.46       | 4.68 | 3.11 | 3.25 | 6.81  | 16.79             | 3.02  | 13.75 | 14.99 | 5.68 |
|                      | dynamic_node   | 67.87k  | 26.28k  | 46.91k  | 35.50k  | 12.10k  | 83.87k   | 56.29k  | 57.47k  | 40.55k  | 24.88k  | 2.47       | 4.28 | 2.45 | 2.28 | 4.11  | 15.10             | 3.22  | 16.09 | 15.00 | 6.62 |
|                      | pci            | 72.69k  | 27.53k  | 48.45k  | 36.59k  | 12.23k  | 90.70k   | 56.01k  | 72.86k  | 51.99k  | 38.15k  | 2.50       | 4.07 | 3.01 | 2.84 | 6.24  | 15.13             | 2.88  | 16.35 | 25.42 | 6.37 |
|                      | usb_funct      | 67.30k  | 26.63k  | 48.60k  | 36.55k  | 12.30k  | 81.58k   | 58.85k  | 60.03k  | 44.10k  | 23.78k  | 2.42       | 4.42 | 2.47 | 2.41 | 3.87  | 21.41             | 3.33  | 19.13 | 21.79 | 7.43 |
|                      | wb_dma_top     | 19.52k  | 8.22k   | 14.60k  | 11.08k  | 3.95k   | 23.03k   | 16.72k  | 17.79k  | 12.52k  | 7.62k   | 2.36       | 4.07 | 2.44 | 2.26 | 3.86  | 15.38             | 3.17  | 13.09 | 15.66 | 5.76 |
|                      | wb_conmax      | 181.45k | 71.84k  | 144.40k | 110.71k | 36.24k  | 221.76k  | 177.04k | 183.96k | 145.80k | 76.57k  | 2.44       | 4.93 | 2.55 | 2.63 | 4.23  | 24.35             | 2.96  | 21.46 | 18.56 | 9.04 |
|                      | usb_phy        | 2.73k   | 1.13k   | 1.84k   | 1.36k   | 0.51k   | 3.22k    | 2.35k   | 2.14k   | 1.42k   | 0.91k   | 2.36       | 4.15 | 2.33 | 2.09 | 3.56  | 10.67             | 3.27  | 11.10 | 11.89 | 4.41 |
| <b>Average</b>       | 42.20k         | 16.68k  | 31.93k  | 24.40k  | 8.76k   | 50.89k  | 39.33k   | 43.32k  | 33.03k  | 19.54k  | 2.42    | 4.30       | 2.67 | 2.61 | 4.78 | 15.65 | 3.06              | 14.71 | 16.23 | 5.98  |      |
| DSP Core             | fir            | 22.63k  | 8.82k   | 16.90k  | 12.98k  | 3.98k   | 27.68k   | 19.51k  | 21.46k  | 16.28k  | 8.80k   | 2.45       | 4.42 | 2.54 | 2.51 | 4.42  | 17.94             | 3.07  | 16.16 | 20.45 | 6.23 |
|                      | jpeg           | 331.18k | 134.01k | 244.06k | 183.26k | 60.85k  | 394.38k  | 301.36k | 297.27k | 236.65k | 118.01k | 2.38       | 4.50 | 2.44 | 2.58 | 3.88  | 23.11             | 3.04  | 23.11 | 24.50 | 8.91 |
|                      | idft           | 817.88k | 313.24k | 527.42k | 392.61k | 134.94k | 1009.40k | 622.01k | 590.78k | 382.70k | 236.06k | 2.47       | 3.97 | 2.24 | 1.91 | 3.50  | 13.06             | 3.26  | 19.57 | 26.46 | 6.64 |
|                      | <b>Average</b> | 390.56k | 152.02k | 262.79k | 196.28k | 66.59k  | 477.15k  | 314.29k | 303.17k | 211.88k | 120.96k | 2.43       | 4.30 | 2.41 | 2.33 | 3.93  | 18.04             | 3.12  | 19.61 | 23.80 | 7.26 |
| <b>Total Average</b> | 124.41k        | 49.92k  | 89.64k  | 64.98k  | 25.06k  | 149.29k | 110.17k  | 107.69k | 78.79k  | 46.60k  | 2.40    | 4.48       | 2.55 | 2.56 | 4.58 | 16.43 | 3.04              | 16.16 | 18.25 | 6.35  |      |

## D. Statistics of Multi-Views

This appendix summarizes structural statistics for 30 circuits across five graph views (b–f): #nodes, #edges, avg\_degree, and avg\_shortest path computed by a unified late-stage pipeline. Table 10 shows consistent patterns aligned with physical design: view (b) has *moderate* degree ( $\approx 2.4$ – $2.6$ ) and *long* paths ( $\approx 11$ – $23$ ); view (c) is the *densest* node-centric option (higher degree, very short paths); views (d)/(e) retain *moderate* degrees with *mid-to-long/very long* diameters; view (f) is *dense, small-world* (high degree, short paths). These structures match trends in Table 3 and Table 4.

### D.1. Why view (b) leads and node-centric views prevail

#### D.1.1. Average Statistics

view (b) balances locality and reach: *moderate degree* ( $\approx 2.40$ ) with *long paths* ( $\approx 16.43$ ). A moderate degree constrains neighborhood breadth—reducing noise amplification and over-mixing—while long paths preserve global dependencies needed for macro-to-cell interactions and net connectivity. view (c) is the *densest* node-centric option (degree  $\approx 4.48$ , paths  $\approx 3.04$ ): high degree and very short paths concentrate information locally; this aids fine-grained aggregation but compresses structural distance, limiting long-range context when global coordination is re-

quired. views (d)/(e) retain *moderate degrees* ( $\approx 2.55/2.56$ ) and *mid-to-long paths* ( $\approx 16.16/18.25$ ), reflecting pin-level dependencies along nets: multi-hop propagation is supported without saturating neighborhoods. view (f) is *dense, small-world* (degree  $\approx 4.58$ , paths  $\approx 6.35$ ), tying distant sub-circuits through hubs; this increases correlation but can blur constraint boundaries and inject hub bias.

#### D.1.2. Cross-Stage Outcomes

Placement favors node-centric graphs: view (b) is strongest, with view (c) close. Placement decisions rely on global context and net topology; B’s long paths and controlled degree deliver broad context without noise, explaining its margin. C competes when local density helps, but its short-path bias can hamper cases needing global coordination. In routing, view (b) remains strongest overall, while among edge-centric views, views (d)/(e) are competitive: their mid-to-long paths track channel capacity and congestion cascades along connections, making them useful complements for routing-oriented analysis. view (f) underperforms because hub-dominated mixing erodes locality and misaligns with edge constraints.

#### D.1.3. Summaries

Prefer view (b) as a robust default across stages. Use view (c) judiciously for workloads dominated by local interactions; treat views (d)/(e) as complementary choices when

```

1 DESIGN ac97_top ;
2 UNITS DISTANCE MICRONS 2000 ;
3 DIEAREA ( 0 0 ) ( 434390 434390 ) ;
4
5 # [Floorplan] Rows, Tracks, and Power Grid defined
6 ROW ROW_0 FreePDK45_38x28_10R_NP_162NW_340 2280 2800 N
   DO 1131 BY 1 STEP 380 0 ;
7 TRACKS X 190 DO 1143 STEP 380 LAYER metal1 ;
8 SPECIALNETS 2 ;
9   - VDD ( * VDD ) + USE POWER
10   + ROUTED metal7 2800 + SHAPE STRIPE ( 61800
   396800 ) ( 398760 396800 ) ;
11 END SPECIALNETS
12
13 # [Routing] Global routing grid added
14 GCELLGRID X 0 DO 103 STEP 4200 ;
15
16 # [Placement] Coords added (+ PLACED); [Routing] Count
   increases
17 COMPONENTS 11178 ;
18   - _10221_ CLKBUF_X2 + PLACED ( 169860 109200 ) FN
   ;
19   - _10222_ INV_X1 + PLACED ( 165300 109200 ) FN
   ;
20 END COMPONENTS
21
22 # [Placement] Pin physical details (+ PORT + LAYER)
   added
23 PINS 132 ;
24   - ac97_reset_pad_o_ + NET ac97_reset_pad_o_ +
   DIRECTION OUTPUT + USE SIGNAL
25   + PORT
26   + LAYER metal6 ( -140 -140 ) ( 140 140 )
27   + PLACED ( 127870 140 ) N ;
28 END PINS
29
30 # [Routing] Detailed geometry segments (+ ROUTED ...
   NEW) added
31 NETS 12959 ;
32   - _00000_ ( u10.dout[0]$_DFF_P_ D ) ( _11175_ ZN )
   + USE SIGNAL
33   + ROUTED metal2 ( 91770 88060 ) ( * 96600 )
34   NEW metal2 ( 91770 96600 ) ( 92150 * )
35   NEW metal1 ( 91770 88060 ) vial_4 ;
36 END NETS
37
38 END DESIGN

```

Listing 2. A DEF file example showing the accumulation of data from Floorplan to Routing.

routing fidelity is prioritized. Avoid view (f) for headline reporting due to small-world mixing and hub bias that harm both placement coordination and routing locality.

## D.2. Why view (d) leads among edge-centric views: statistical comparison

### D.2.1. Key Statistics

view (d) combines *moderate degree* with *mid-to-long paths*, yielding expressive yet unsaturated neighborhoods. Compared with view (e), degrees are similar on average, but E's paths are consistently longer, shifting useful interactions to larger hop distances. view (f) exhibits *higher degrees* and *shorter paths*, encouraging small-world mixing and hub bias that blur fine-grained signals. In edges-to-nodes balance, view (d) remains near-linear, whereas view (f) increases density and alters neighborhood selectivity.

---

## Algorithm 1 DEF-to-Graph Conversion Process

---

**Require:** DEF file  $\mathcal{D}$

**Ensure:** Heterogeneous Graph  $\mathcal{G} = (\mathcal{V}, \mathcal{E})$

```

1: Initialization:  $\mathcal{V} \leftarrow \emptyset, \mathcal{E} \leftarrow \emptyset$ 
2:  $\mathcal{D}_{data} \leftarrow \text{ParseDEF}(\mathcal{D})$ 
3: {Phase 1: Node Construction}
4: for all  $comp \in \mathcal{D}_{data}.components$  do
5:    $v_{gate} \leftarrow \text{CreateGateNode}(comp)$ 
6:    $\mathcal{V}.add(v_{gate})$ 
7: end for
8: for all  $net \in \mathcal{D}_{data}.nets$  do
9:    $v_{net} \leftarrow \text{CreateNetNode}(net)$ 
10:   $\mathcal{V}.add(v_{net})$ 
11: end for
12: for all  $pin \in \mathcal{D}_{data}.pins$  do
13:    $v_{io} \leftarrow \text{CreateIOPinNode}(pin)$ 
14:    $\mathcal{V}.add(v_{io})$ 
15: end for
16: for all  $int\_pin \in \mathcal{D}_{data}.internal.pins$  do
17:    $v_{pin} \leftarrow \text{CreatePinNode}(int\_pin)$ 
18:    $\mathcal{V}.add(v_{pin})$ 
19: end for
20: {Phase 2: Edge Construction}
21: for all  $net \in \mathcal{D}_{data}.nets$  do
22:   for all  $(comp, pin) \in net.connections$  do
23:     if  $comp == \text{'PIN'}$  then
24:        $\mathcal{E}.add((v_{io}, v_{net}))$  {Edge: IO Pin  $\leftrightarrow$  Net}
25:     else
26:        $\mathcal{E}.add((v_{pin}, v_{net}))$  {Edge: Internal Pin  $\leftrightarrow$  Net}
27:     end if
28:   end for
29: end for
30: for all  $comp \in \mathcal{D}_{data}.components$  do
31:   for all  $pin \in comp.pins$  do
32:      $\mathcal{E}.add((v_{gate}, v_{pin}))$  {Edge: Gate  $\leftrightarrow$  Pin}
33:   end for
34: end for
35: {Phase 3: Feature Encoding}
36: for all  $v \in \mathcal{V}$  do
37:    $v.x \leftarrow \text{EncodeNodeFeatures}(v)$ 
38: end for
39: for all  $e \in \mathcal{E}$  do
40:    $e.attr \leftarrow \text{EncodeEdgeFeatures}(e)$ 
41: end for
42:  $\mathcal{G}.global \leftarrow \text{ExtractGlobalFeatures}(\mathcal{D}_{data})$ 
43: return  $\mathcal{G}$ 

```

---

### D.2.2. Cross-Stage Alignment

For routing-oriented analysis, view (d) is the strongest edge-centric complement; view (e) supports longer-range effects when they are critical; view (f)'s small-world structure is generally misaligned.

### D.2.3. Summaries

Average structural statistics explain stage-level outcomes without model-specific details: view (b) is robust across

Table 11. Placement Task Hyperparameters for Different Graph Views

| Hyper       | lr   | wd   | hid_dim | act       | gnn_layer | dropout | head_layer | head_dim |
|-------------|------|------|---------|-----------|-----------|---------|------------|----------|
| (b)         |      |      |         |           |           |         |            |          |
| GINE        | 1e-4 | 1e-4 | 256     | relu      | 4         | 0.3     | 2          | 256      |
| ResGatedGCN | 1e-4 | 1e-4 | 256     | relu      | 4         | 0.3     | 2          | 256      |
| GAT         | 1e-4 | 1e-4 | 256     | relu      | 4         | 0.3     | 2          | 256      |
| (c)         |      |      |         |           |           |         |            |          |
| GINE        | 1e-4 | 1e-4 | 256     | relu      | 4         | 0.3     | 2          | 256      |
| ResGatedGCN | 1e-4 | 1e-4 | 256     | relu      | 4         | 0.3     | 2          | 256      |
| GAT         | 1e-4 | 1e-4 | 256     | relu      | 4         | 0.3     | 2          | 256      |
| (d)         |      |      |         |           |           |         |            |          |
| GINE        | 5e-4 | 1e-5 | 256     | leakyrelu | 4         | 0.3     | 2          | 256      |
| ResGatedGCN | 5e-4 | 1e-5 | 256     | leakyrelu | 4         | 0.3     | 2          | 256      |
| GAT         | 5e-4 | 1e-5 | 256     | leakyrelu | 4         | 0.3     | 2          | 256      |
| (e)         |      |      |         |           |           |         |            |          |
| GINE        | 5e-4 | 1e-5 | 256     | leakyrelu | 4         | 0.3     | 2          | 256      |
| ResGatedGCN | 5e-4 | 1e-5 | 256     | leakyrelu | 4         | 0.3     | 2          | 256      |
| GAT         | 5e-4 | 1e-5 | 256     | leakyrelu | 4         | 0.3     | 2          | 256      |
| (f)         |      |      |         |           |           |         |            |          |
| GINE        | 5e-4 | 1e-5 | 256     | leakyrelu | 4         | 0.3     | 2          | 256      |
| ResGatedGCN | 5e-4 | 1e-5 | 256     | leakyrelu | 4         | 0.3     | 2          | 256      |
| GAT         | 5e-4 | 1e-5 | 256     | leakyrelu | 4         | 0.3     | 2          | 256      |

Table 12. Routing Task Hyperparameters for Different Graph Views

| Hyper       | lr   | wd   | hid_dim | act       | gnn_layer | dropout | head_layer | head_dim |
|-------------|------|------|---------|-----------|-----------|---------|------------|----------|
| (b)         |      |      |         |           |           |         |            |          |
| GINE        | 1e-4 | 1e-4 | 256     | leakyrelu | 4         | 0.3     | 2          | 256      |
| ResGatedGCN | 1e-4 | 1e-4 | 256     | leakyrelu | 4         | 0.3     | 2          | 256      |
| GAT         | 1e-4 | 1e-4 | 256     | leakyrelu | 4         | 0.3     | 2          | 256      |
| (c)         |      |      |         |           |           |         |            |          |
| GINE        | 1e-4 | 1e-4 | 256     | leakyrelu | 4         | 0.3     | 2          | 256      |
| ResGatedGCN | 1e-4 | 1e-4 | 256     | leakyrelu | 4         | 0.3     | 2          | 256      |
| GAT         | 1e-4 | 1e-4 | 256     | leakyrelu | 4         | 0.3     | 2          | 256      |
| (d)         |      |      |         |           |           |         |            |          |
| GINE        | 5e-4 | 1e-5 | 256     | leakyrelu | 4         | 0.3     | 2          | 256      |
| ResGatedGCN | 5e-4 | 1e-5 | 256     | leakyrelu | 4         | 0.3     | 2          | 256      |
| GAT         | 5e-4 | 1e-5 | 256     | leakyrelu | 4         | 0.3     | 2          | 256      |
| (e)         |      |      |         |           |           |         |            |          |
| GINE        | 5e-4 | 1e-5 | 256     | leakyrelu | 4         | 0.3     | 2          | 256      |
| ResGatedGCN | 5e-4 | 1e-5 | 256     | leakyrelu | 4         | 0.3     | 2          | 256      |
| GAT         | 5e-4 | 1e-5 | 256     | leakyrelu | 4         | 0.3     | 2          | 256      |
| (f)         |      |      |         |           |           |         |            |          |
| GINE        | 5e-4 | 1e-5 | 256     | leakyrelu | 4         | 0.3     | 2          | 256      |
| ResGatedGCN | 5e-4 | 1e-5 | 256     | leakyrelu | 4         | 0.3     | 2          | 256      |
| GAT         | 5e-4 | 1e-5 | 256     | leakyrelu | 4         | 0.3     | 2          | 256      |

placement and routing; view (c) is strong but less stable; views (d)/(e) are viable edge-centric complements; view (f) is not recommended for headline results.

## E. Hyperparameter Tuning

The experimental results for the Placement Task across different graph views (b-f), as presented in Table 3 of the main paper, and for the Routing Task in Table 4, were obtained using the specific hyperparameter configurations detailed in Table 11 and Table 12, respectively. To ensure a fair and consistent comparison across the different graph views, each model (GINE, ResGatedGCN, GAT) utilized a single, fixed set of hyperparameters for all views within a given task. This means that the same hyperparameter values were applied to all views (b), (c), (d), (e), and (f) for the Placement task, and similarly for the Routing task, without further view-specific tuning.

## F. GNN Depth and Head Depth

The following four tables (Table 13-Table 16) present supplementary experiments for the Placement and Routing

Table 13. Placement on view (d) vs. GNN depth (3–6).

| #layers | GINE          |               |                  |         | ResGatedGCN   |               |                  |         |
|---------|---------------|---------------|------------------|---------|---------------|---------------|------------------|---------|
|         | MAE↓          | RMSE↓         | R <sup>2</sup> ↑ | #Param. | MAE↓          | RMSE↓         | R <sup>2</sup> ↑ | #Param. |
| 3       | 0.4552        | 0.6098        | 0.6811           | 0.83M   | <b>0.4521</b> | <b>0.6026</b> | <b>0.6886</b>    | 1.62M   |
| 4       | 0.4451        | 0.5937        | 0.6975           | 1.03M   | 0.4670        | 0.6197        | 0.6704           | 2.08M   |
| 5       | 0.4837        | 0.6467        | 0.6414           | 1.23M   | 0.4700        | 0.6077        | 0.6833           | 2.54M   |
| 6       | <b>0.4063</b> | <b>0.5478</b> | <b>0.7427</b>    | 1.42M   | 0.5449        | 0.6786        | 0.6051           | 3.00M   |

Table 14. Routing on view (d) vs. GNN depth (3–6).

| #layers | GINE          |               |                  |         | ResGatedGCN   |               |                  |         |
|---------|---------------|---------------|------------------|---------|---------------|---------------|------------------|---------|
|         | MAE↓          | RMSE↓         | R <sup>2</sup> ↑ | #Param. | MAE↓          | RMSE↓         | R <sup>2</sup> ↑ | #Param. |
| 3       | 0.5470        | 0.7172        | 0.6000           | 0.83M   | 0.5732        | 0.7557        | 0.5558           | 1.62M   |
| 4       | 0.6111        | 0.7920        | 0.5122           | 1.03M   | 0.6007        | 0.7826        | 0.5237           | 2.08M   |
| 5       | <b>0.5062</b> | <b>0.6805</b> | <b>0.6398</b>    | 1.22M   | <b>0.5413</b> | <b>0.7091</b> | <b>0.6090</b>    | 2.54M   |
| 6       | 0.5964        | 0.7571        | 0.5542           | 1.42M   | 0.6803        | 0.8942        | 0.3782           | 3.00M   |

Table 15. Placement on view (d) vs. head layers (1–4).

| #layers | GINE          |               |                  |         | ResGatedGCN   |               |                  |         |
|---------|---------------|---------------|------------------|---------|---------------|---------------|------------------|---------|
|         | MAE↓          | RMSE↓         | R <sup>2</sup> ↑ | #Param. | MAE↓          | RMSE↓         | R <sup>2</sup> ↑ | #Param. |
| 1       | nan           | nan           | nan              | 0.90M   | nan           | nan           | nan              | 1.95M   |
| 2       | 0.4451        | 0.5937        | 0.6975           | 1.03M   | 0.4670        | 0.6197        | 0.6704           | 2.08M   |
| 3       | <b>0.4337</b> | <b>0.5804</b> | <b>0.7109</b>    | 1.10M   | 0.4576        | 0.6043        | 0.6866           | 2.15M   |
| 4       | 0.4359        | 0.5851        | 0.7062           | 1.16M   | <b>0.4418</b> | <b>0.5922</b> | <b>0.6990</b>    | 2.21M   |

Table 16. Routing on view (d) vs. head layers (1–4).

| #layers | GINE          |               |                  |         | ResGatedGCN   |               |                  |         |
|---------|---------------|---------------|------------------|---------|---------------|---------------|------------------|---------|
|         | MAE↓          | RMSE↓         | R <sup>2</sup> ↑ | #Param. | MAE↓          | RMSE↓         | R <sup>2</sup> ↑ | #Param. |
| 1       | nan           | nan           | nan              | 0.90M   | nan           | nan           | nan              | 1.95M   |
| 2       | 0.6111        | 0.792         | 0.5122           | 1.03M   | 0.6007        | 0.7826        | 0.5237           | 2.08M   |
| 3       | <b>0.4637</b> | <b>0.6148</b> | <b>0.7060</b>    | 1.09M   | 0.5678        | 0.7551        | 0.5565           | 2.14M   |
| 4       | 0.4971        | 0.6636        | 0.6581           | 1.16M   | <b>0.5445</b> | <b>0.7099</b> | <b>0.6089</b>    | 2.21M   |

tasks under view (d). These experiments investigate the impact of two key architectural hyperparameters—the depth of the Graph Neural Network (GNN) backbone and the number of prediction head layers—on model performance. The results indicate that the number of GNN layers has a relatively minor and inconsistent effect, whereas the number of head layers is a crucial factor significantly influencing the outcomes.

**Impact of GNN Depth** (Table 13 and Table 14): The number of GNN layers (ranging from 3 to 6) does not exhibit a consistent impact on model performance. In Table 13 (Placement), GINE achieves its best results at deeper configurations, whereas ResGatedGCN performs best with fewer layers. A similar observation holds for routing in Table 14, where both models achieve their strongest results at intermediate depths rather than at the deepest settings. Across both tasks, the performance metrics fluctuate across layer configurations without showing a clear monotonic trend. These results suggest that increasing GNN depth alone does not consistently improve prediction quality, and that message-passing depth is not a dominant factor for these tasks.

**Impact of Head Layers** (Table 15 and Table 16): In contrast, the number of head layers (ranging from 1 to 4) has a much stronger influence on performance. In Table 15 (Placement), increasing the depth of the prediction head leads to noticeable improvements for both GINE and ResGatedGCN. A similar trend is observed in Table 16 (Routing), where deeper prediction heads consistently produce

better results. These improvements indicate that the design of the prediction head plays a crucial role in model performance. In particular, richer head architectures appear to provide stronger capacity for mapping learned node or edge embeddings to task-specific targets, highlighting the importance of prediction-head design in GNN-based physical design tasks.
